# Supplementary material for: Impact of Social Distancing Due to Coronavirus Disease 2019 on the Changes in Glycosylated Hemoglobin Level in People with Type 2 Diabetes Mellitus
Source: PubMed Central journal article supplement — Diabetes Metab J. 2020 Dec 4;45(1):109–14. doi: 10.4093/dmj.2020.0226 (PMC7850869; doi:10.4093/dmj.2020.0226), 2020-12-04
Supplement: dmj-2020-0226-suppl1.pdf [file dmj-2020-0226-suppl1.pdf]

**Supplementary Table 1.** Estimated mean of change of glycosylated hemoglobin after adjustment for multiple confounding factors

| Variable                                     | COVID-19 cohort<br>(11/18/2019–05/17/2020) | Non-COVID-19 cohort 1<br>(11/18/2018–05/17/2019) | Non-COVID-19 cohort 2<br>(11/18/2017–05/17/2018) | P value |
|----------------------------------------------|--------------------------------------------|--------------------------------------------------|--------------------------------------------------|---------|
| All subjects                                 | 0.04±0.02                                  | −0.12±0.02                                       | −0.10±0.02                                       | <0.01   |
| Adjusted ΔHbA1c, according to sex            |                                            |                                                  |                                                  |         |
| Male                                         | 0.04±0.03                                  | −0.10±0.03                                       | −0.14±0.03                                       | <0.01   |
| Female                                       | 0.04±0.03                                  | −0.13±0.03                                       | −0.05±0.03                                       | <0.01   |
| Adjusted ΔHbA1c, according to age            |                                            |                                                  |                                                  |         |
| <50 yr                                       | 0.18±0.06                                  | −0.23±0.06                                       | −0.29±0.06                                       | <0.01   |
| 50–59 yr                                     | −0.01±0.03                                 | −0.12±0.03                                       | −0.14±0.03                                       | 0.02    |
| 60–69 yr                                     | 0.03±0.04                                  | −0.11±0.04                                       | −0.04±0.04                                       | 0.03    |
| ≥70 yr                                       | 0.04±0.03                                  | −0.07±0.03                                       | −0.05±0.03                                       | 0.04    |
| Adjusted ΔHbA1c, according to baseline HbA1c |                                            |                                                  |                                                  |         |
| ≤7.0%                                        | 0.34±0.02                                  | 0.16±0.02                                        | 0.17±0.02                                        | <0.01   |
| 7.1%–8.9%                                    | 0.09±0.02                                  | −0.10±0.02                                       | 0.01±0.02                                        | <0.01   |
| ≥9.0%                                        | −0.91±0.08                                 | −1.00±0.08                                       | −1.11±0.08                                       | 0.24    |

Values are presented as mean ± standard error. Data were analyzed using analysis of covariance. COVID-19, coronavirus disease 2019; HbA1c, glycosylated hemoglobin.
