# Supplementary figures and images for: Impact of Social Distancing Due to Coronavirus Disease 2019 on the Changes in Glycosylated Hemoglobin Level in People with Type 2 Diabetes Mellitus
Source: PubMed Central journal article supplement — Diabetes Metab J. 2020 Dec 4;45(1):109–14. doi: 10.4093/dmj.2020.0226 (PMC7850869; doi:10.4093/dmj.2020.0226), 2020-12-04

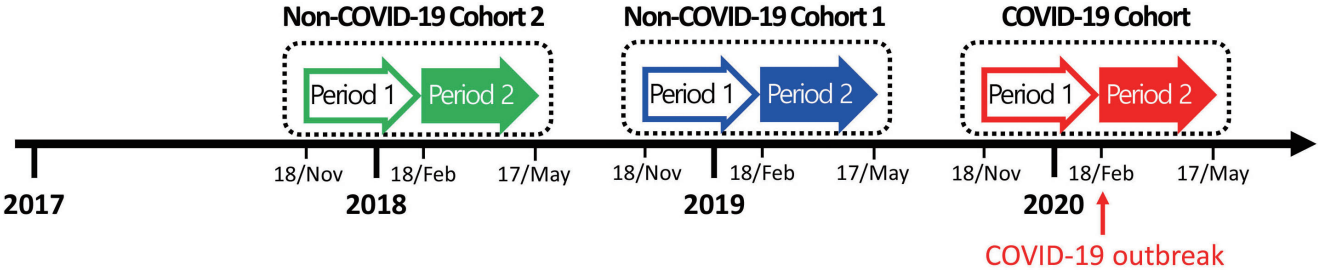

Supplementary Fig. 1. The flow chart of the study design. COVID-19, coronavirus disease 2019.

Supplement: dmj-2020-0226-suppl2.pdf [file dmj-2020-0226-suppl2.pdf]
